# Supplementary material for: Leveraging epigenomes and three-dimensional genome organization for interpreting regulatory variation
Source: bioRxiv or medRxiv preprint supplement (doi:10.1101/2021.08.29.458098), 2021-08-30
Supplement: Supplementary file [file media-1.pdf]

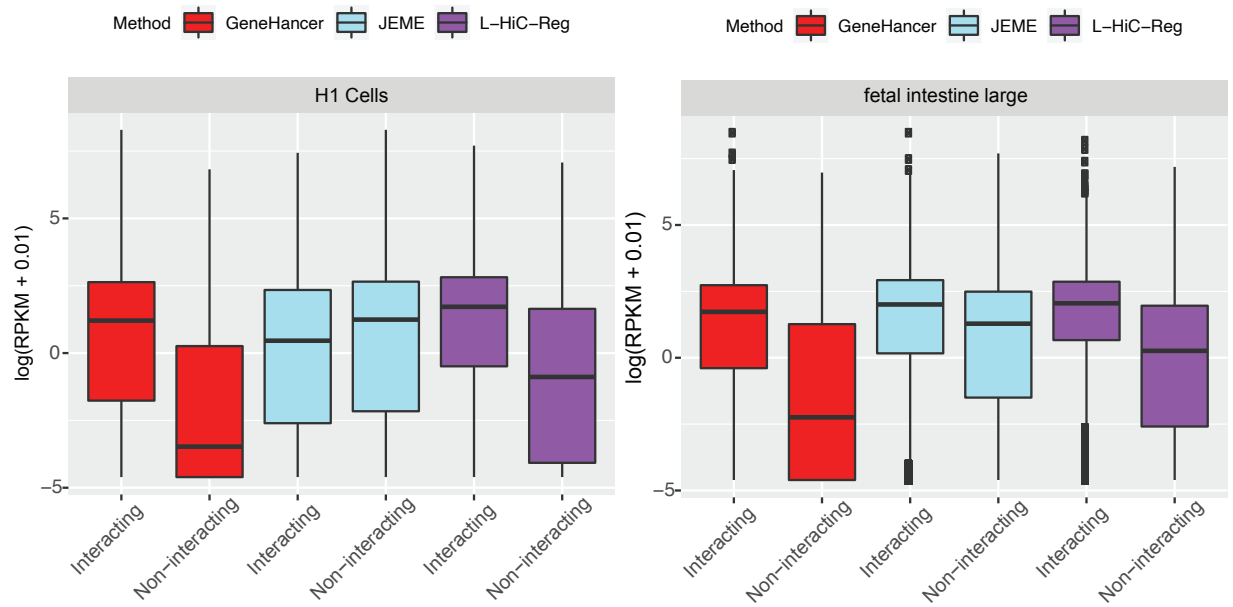

**Supplemental Figure 2.** Expression of interacting versus non-interacting genes for additional cell lines with expression data and predictions in both JEME and L-HiC-Reg. Related to Main Figure 3.

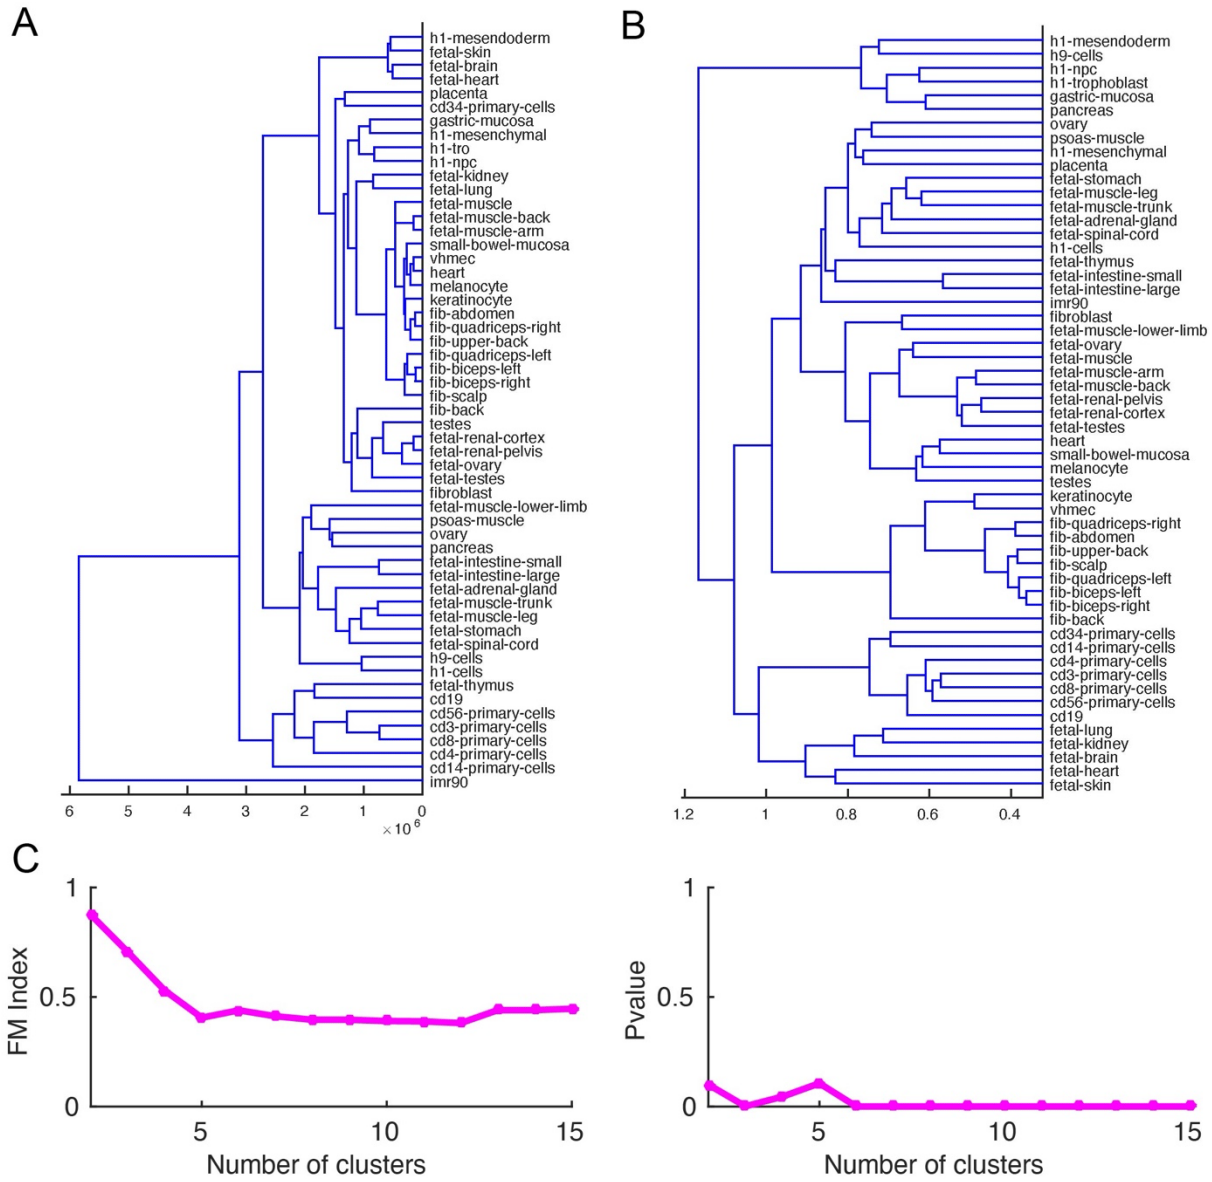

**Supplemental Figure 3. A.** Hierarchical clustering tree showing the similarity of H3K4me3 ChIP-Seq signal in the TSS of genes. This tree was used as input for the Multi-task Graph Clustering algorithm. **B.** Hierarchical clustering based on the F-score of shared interactions between cell lines. **C.** Fowlkes-Mallows index (left) comparing the similarity of two hierarchical clusterings at different levels of clustering with the associated P-value (right) based on random permutation.

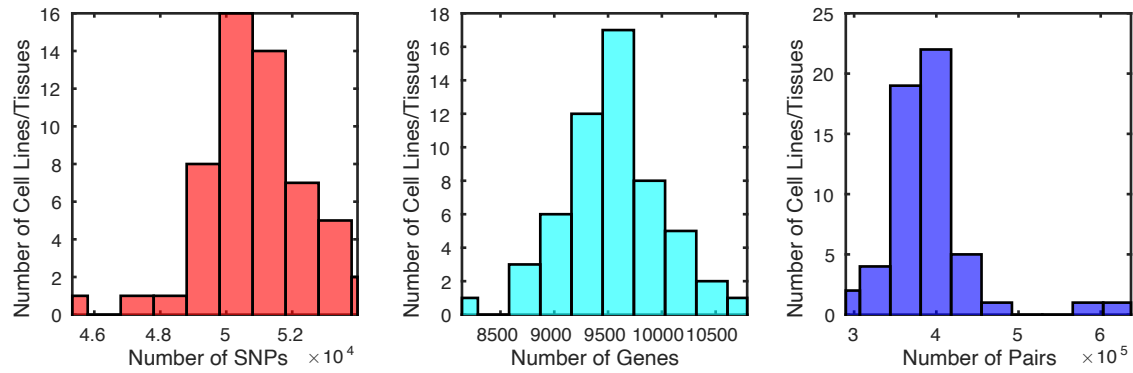

**Supplemental Figure 4.** Distribution of the number of SNPs in LD with the GWAS non-coding SNPs from the NHGRI-EBI GWAS Catalog (left), the number of genes mapped to these SNPs (middle) and the number of pairs connect SNPs to genes across multiple cell lines (left).

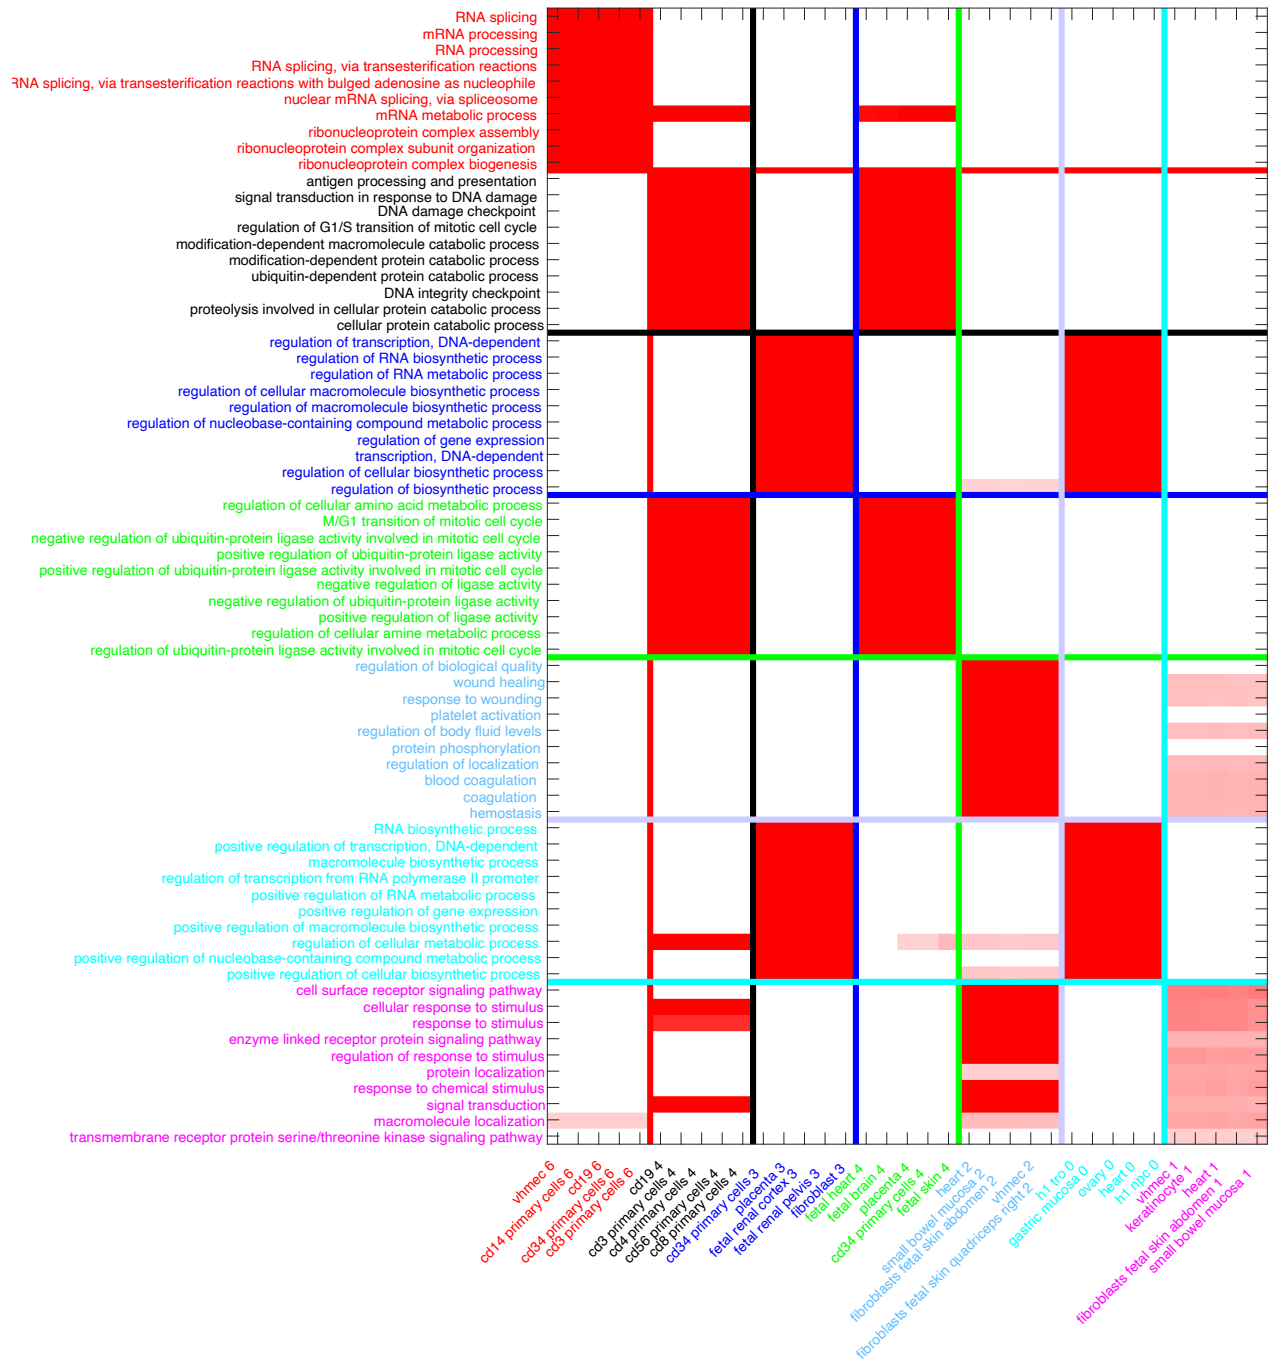

**Supplemental Figure 5.** Top Gene Ontology terms and cell lines across the 7 multi-task graph clustering clusters. Numbers next to the cell line name represents the graph cluster. To enable extraction of meaningful annotation from our GO analysis, we applied Non-negative Matrix Factorization with seven low-dimensional factors on the  $-\log(q\text{-value})$  scores of all the GO terms across all cell lines and gene clusters. For each NMF factor, the top 10 GO terms and the top 5 cell lines were selected based on their values in the corresponding lower-dimensional factors.

A

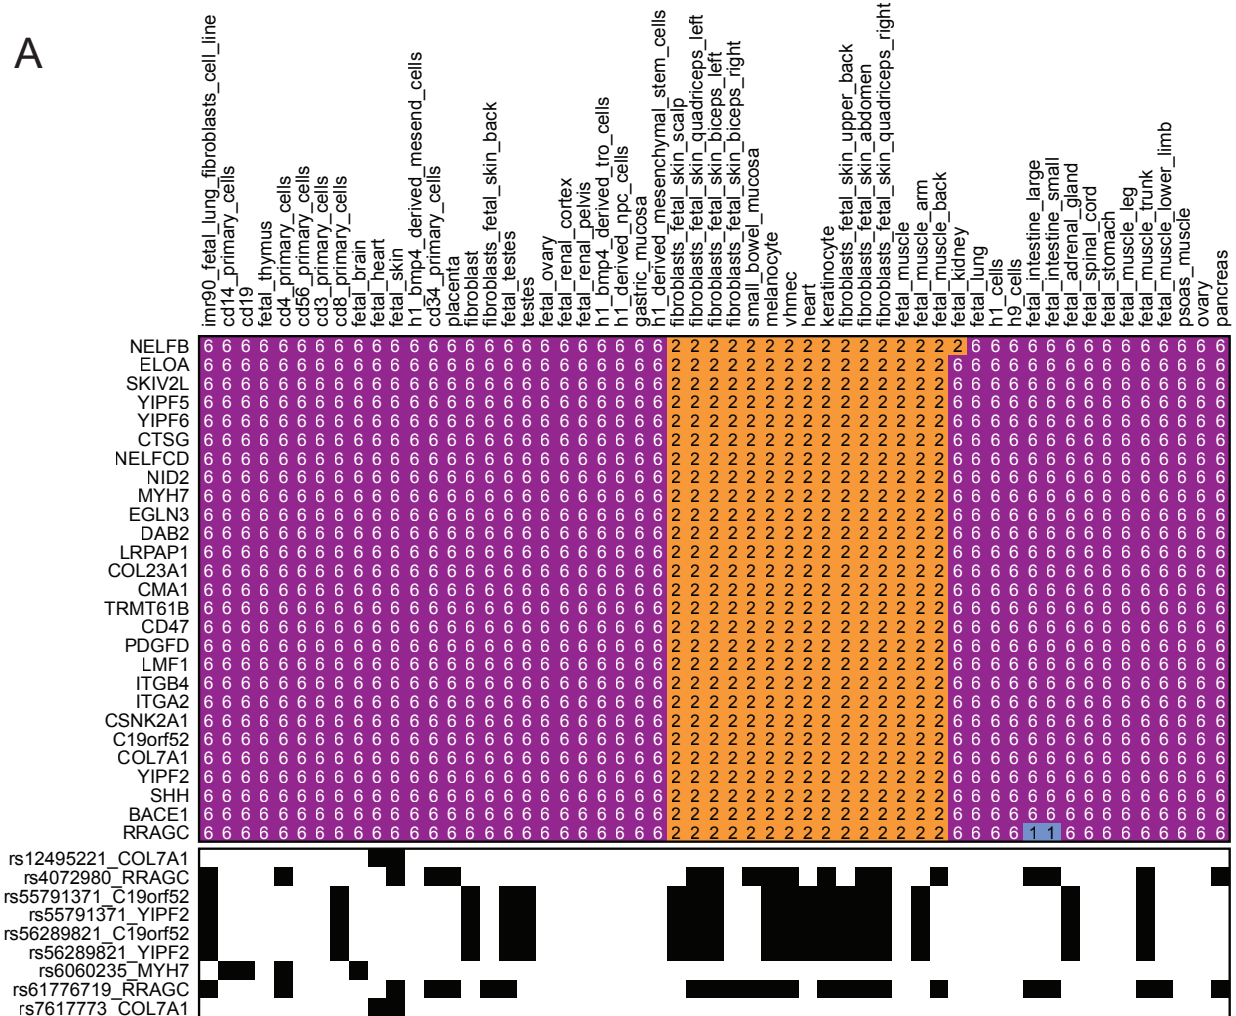

B

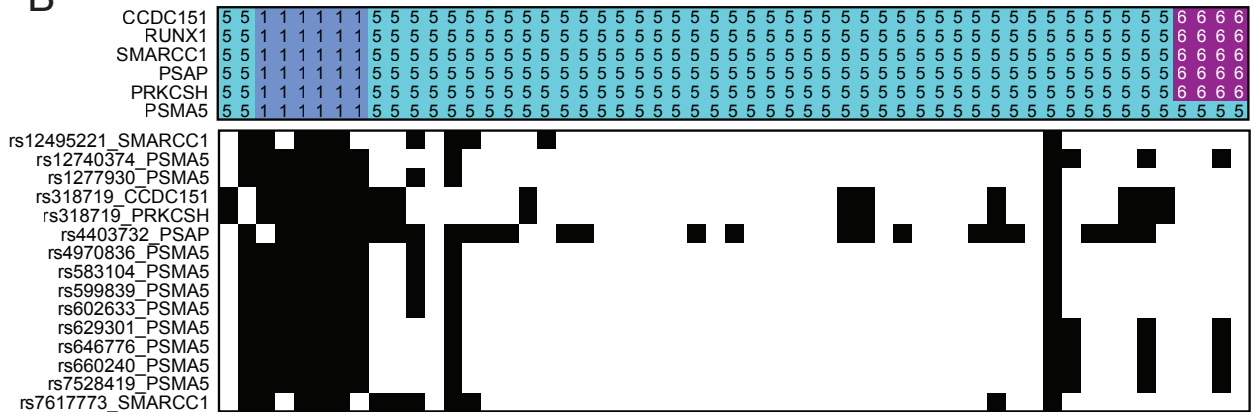

C

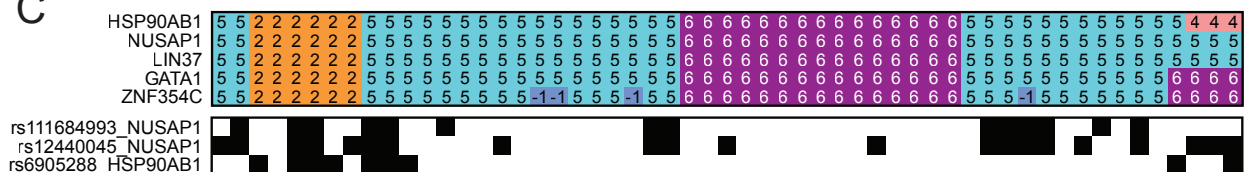

**Supplemental Figure 6.** Gene sets with changes in graph cluster assignment across cell lines that exhibit concordant presence-absence of SNP-gene interactions for Coronary Artery Disease (CAD). Shown are three gene sets, #37 (**A.**), #46 (**B.**) and #53 (**C.**). Color heatmaps represent the cluster assignments for all 55 cell lines and the black and white heatmaps represents the presence (black) or absence (white) of the SNP-gene interaction with specific genes in the gene set across the cell lines.
